# Supplementary material
Source: PubMed Central journal article supplement (PMC3646260)
Supplement: NIHMS452877-supplement-Appendix_A__Supplementary_data.pdf [file NIHMS452877-supplement-Appendix_A__Supplementary_data.pdf]

## **Albumin storage in neoplastic astroglial elements of gangliogliomas**

Appendix

## Supplementary methods

### *Patients and surgical specimens*

Patients with GG (n=10), DNT (n=5) and FCD IIb (n=10) had a history of drug-refractory epilepsy and surgical removal of the epileptogenic focus was deemed essential to achieve seizure control according to established guidelines.<sup>1</sup> Patients with DA (n=5) and RCCM (n=6) underwent surgery due to oncological indication. All procedures were carried out in accordance with the declaration of Helsinki.

### *Tissue processing and standard examinations*

All material was fixed with formaldehyde overnight, embedded into paraffin, cut into 4 µm sections and mounted on slides (HistoBond<sup>®+</sup>, Marienfelde Germany). Neuropathological analysis of GG, DNT, FCD IIb, DA and RCCM comprised at least H&E- and Prussian blue staining as well as immunohistochemistry for glial fibrillary acidic protein (GFAP, DakoCytomation). Additional specific examinations were done for GG (CD 34, DakoCytomation; synaptophysin, DakoCytomation), FCD IIb (MAP2, SigmaAldrich; NeuN, Chemicon), RCCM (Lu5, Bachem) and DNT (NeuN, Chemicon; S100, DakoCytomation). Macroscopic and histopathologic examinations were performed by experienced neuropathologists (AJB, PN). FCD IIb was diagnosed according to the ILAE consensus classification proposal for FCD.<sup>2</sup>

### *Double-immunohistochemistry*

For double-immunohistochemistry slides were deparaffinised in xylene, rinsed in ethanol and incubated in citrate buffer (10mM, pH 6.0). After washing in phosphate-buffered saline (PBS), brain sections were blocked for 2h at 37C° with a blocking solution containing fetal calf serum (FCS) 1:10, normal goat serum (NGS) 1:100 and PBS, to inhibit nonspecific antibody binding. To identify albumin containing

astrocytes, slides were incubated with anti-albumin antibody 1:4000 (polyclonal rabbit; DakoCytomation), monoclonal GFAP-antibody 1:400 (monoclonal mouse; Sigma-Aldrich), FCS 1:10 and PBS at 4C° overnight. Sections were incubated with secondary antibodies, Cy3 mouse 1:400 (Jackson ImmunoResearch) and FITC rabbit 1:400 (Jackson ImmunoResearch) and 4',6-diamidino-2-phenylindole 1:100 (DAPI, Sigma-Aldrich, 5mg/ml), which labels cell nuclei, FCS 1:10 and PBS. Afterwards sections were stored in a dark place for 2 hours, washed with PBS, and coverslipped with fluorescein mounting medium (Vectashield hard set, VectorLaboratories). Additional fluorescent double-immunohistochemistry for CD34/albumin and CD34/GLUT-1 were performed in all entities according to the staining protocol (see above) using anti-CD34 class II antibody 1:30 (monoclonal mouse; DakoCytomation) and anti-GLUT-1 antibody 1:100 (polyclonal rabbit; Abcam).

### *Image analysis*

Microscope images of representative lesional and perilesional regions were acquired for each patient using a Zeiss Imager.Z1 Apotome microscope with 20x Plan Apochromat (NA 0.8) and 40x Plan NeoFLUAR (NA 0.75), AxioCam MRm and the AxioVision Software. Images of the vascular regions were observed with a Zeiss Axio Observer.A1 using the 20x Plan Apochromat, a 40x LD Plan-Neofluar (NA 0.6) and a Jenoptik ProgRes CFcool CCD camera (Jena, Germany). Pictures were stored in their original formats and final images for figures were prepared in Adobe Photoshop: levels and brightness/contrast of images were minimally and evenly adjusted over the entire micrograph.

## References

1. Schramm J, Clusmann H. The surgery of epilepsy. *Neurosurgery* 2008; **62**: 463-81
2. Blumcke I, Thom M, Aronica E, Armstrong DD, Vinters HV, Palmini A, et al. The clinicopathologic spectrum of focal cortical dysplasias: a consensus classification proposed by an ad hoc Task Force of the ILAE Diagnostic Methods Commission. *Epilepsia* 2011; **52**: 158-74
